# Supplementary material
Source: Research Square preprint supplement (doi:10.21203/rs.3.rs-9654569/v1)
Supplement: Supplementary file 1 [file ed566230be2365c70be1d297.docx]

# 11. Appendix A – Table 1B: Pharmacokinetic Washout Protocols and Evidence Levels

| **Compound** | **Intended Biosupport Role** | ***t½* (Terminal)** | **Evidence Level** | **Washout Protocol** | **Documentation (Ref. nr.)** |
| --- | --- | --- | --- | --- | --- |
| **AHCC** | Immune support | 12–24 hours | 3 (Yellow) | 5 days | [30, 31, 32] |
| ***Akkermansia*** | Metabolism / Barrier | 3–5 days (fecal) | 3 (Yellow) | 2 weeks | [33] |
| **Activated charcoal** | GI absorption | N/A (transit) | 1 (White) | 1 day | [34] |
| **ALA** | Antioxidant / Neuro-protection | 15–20 minutes | 1 (White) | 2 days | [11, 35, 36, 37] |
| **Amygdalin** | Toxic (cyanide) | 45–120 minutes | 1 (White) | 2 days | [38] |
| ***Andrographis*** | Anti-inflammatory | 2–7 hours | 2 (Green) | 2 days | [39] |
| **Apigenin **** | Flavonoid / Signaling | 91.8 hours | 4 (Orange) | 19 days / 3 days | [2, 40, 41, 42, 43] |
| **Artemisinin** | Integrative support | 1–5 hours | 1 (White) | 1 day | [44, 45] |
| **Ashwagandha** (*Withania somnifera*) | Adaptogen / Hormonal | 1–5 hours | 3 (Yellow) | 2 days | [46] |
| ***Astragalus*** | Immuno-modulation | 2.1–2.7 hours | 1 (White) | 1 day | [47, 48, 49, 50] |
| **Baicalin** | Anti-inflammatory | N/A | 2 (Green) | 2 days | [51] |
| **Berberine** | Metabolic / AMPK | 12–15 hours | 1 (White) | 3 days | [52, 53] |
| **Boron** | Hormonal modulation | ~21 hours | 1 (White) | 5 days | [54, 55] |
| ***Boswellia*** | Anti-inflammatory | 6.8 hours | 1 (White) | 4 days | [56, 57, 58] |
| **Butyrate** | GI health | 0.5–14 minutes | 1 (White) | 1 day | [59, 60] |
| ***Cannabis*** | CNS / Pain relief | >134 hours (CBD) | 1 (White) | 28 days | [61, 62, 63] |
| **CoQ10** | Mitochondrial / Antioxidant | 33–57 hours | 1 (White) | 12 days | [64, 65, 66] |
| **DCA** | Bioenergetics | 1–10+ hours | 1 (White) | 14 days | [67, 68, 69] |
| **DIM** | Estrogen metabolism | 4–8 hours | 2 (Green) | 3 days | [70, 71, 72] |
| **EGCG** | Antioxidant / Polyphenol | 3–5 hours | 1 (White) | 2 days | [18, 73, 74] |
| **Genistein** | Isoflavone / Hormonal | 3.8–10.2 hours | 1 (White) | 4 days | [75, 76, 77] |
| **Shark liver oil** | Alkylglycerols | N/A | 1 (White) | 2 days | [78, 79, 80] |
| **Honokiol** | CYP modulation | 2.5–5 hours | 1 (White) | 3 days | [81, 82, 83] |
| **I3C** | Pro-drug for DIM | < 1 hour | 1 (White) | 3 days | [84, 85, 86] |
| **Ginger** *(Zingiber officinale)* | Anti-inflammatory | 0.6–2.4 hours | 1 (White) | 2 days | [87, 88, 89] |
| **L-Carnitine** | Mitochondrial transport | 25.7–60.3 hours | 1 (White) | 13 days | [90, 91, 92] |
| **LDN** | Immunomodulation | 4–13 hours | 1 (White) | 3 days | [21, 93, 94, 95] |
| **L-Glutamine** | GI barrier / Energy | 1–2 hours | 1 (White) | 2 days | [96, 97, 98] |
| **Lip. Curcumin** | Anti-inflammatory | 6–42 minutes | 1 (White) | 2 days | [16, 99, 100, 101] |
| **Luteolin** | Signaling modulation | 5–9 hours | 4 (Orange) | 2 days | [102, 103, 104] |
| **Lysine** | Amino acid / Collagen | 15–16 hours | 1 (White) | 4 days | [105, 106, 107] |
| **Magnesium** | Electrolyte balance | N/A | 1 (White) | 2 days | [108, 109, 110] |
| **Milk thistle** *(Silybum marianum)* | Liver protection | 1–8 hours | 1 (White) | 2 days | [111, 112] |
| **Melatonin** | Hormonal / Sleep | 40–60 minutes | 1 (White) | 1 day | [23, 113, 114, 115] |
| **Metformin** | Metabolic / AMPK | 1.5–6.2 hours | 1 (White) | 5 days | [13, 19, 116, 117] |
| **Probiotics** | Gut microbiome | N/A (persistence) | 1 (White) | 2 / 6 days | [10, 118, 119] |
| **NAC** | Redox balance | 2.0–6.3 hours | 1 (White) | 4 days | [120, 121, 122] |
| **Niacin** | NAD+ precursor | 0.5–4.3 hours | 1 (White) | 2 days | [123, 124, 125] |
| ***Nigella Sativa*** | Thymoquinone / CYP | N/A | 3 (Yellow) | 4 days | [17, 126, 127, 128] |
| **Omega-3** | Membrane stability | 37–79 hours | 1 (White) | 21 days | [129, 130, 131, 132] |
| ***Pao pereira*** | Beta-carbolines | 12–24 hours | 4 (Orange) | 5 days | [133, 134] |
| **Papaya leaf** *(Carica papaya)* | Platelet support | 24–48 hours | 1 (White) | 10 days | [135, 136, 137] |
| **Pau D’Arco** *(Handroanthus impetiginosus)* | Naphthoquinones | 24–48 hours | 1 (White) | 10 days | [138, 139, 140] |
| **Quercetin** | Flavonol / CYP inh. | 1–3 hours | 1 (White) | 3 days | [4, 22, 141, 142, 143] |
| **Resveratrol** | Polyphenol / IGF-1 | 2–9.7 hours | 1 (White) | 3 days | [144, 145, 146] |
| ***Rhodiola rosea*** | Adaptogen / Cortisol | 4–6 hours | 1 (White) | 3 days | [147, 148, 149] |
| **Medic. mushrooms** | Immunomodulation | 0.5–1 hour | 1 (White) | 5 days | [150, 151, 152] |
| **Sulforaphane** | Detoxification enzymes | 2–3 hours | 1 (White) | 3 days | [153, 154, 155] |
| **TUDCA** | Bile acid / Chaperone | 3.5–5.8 days | 1 (White) | 28 days | [156, 157, 158] |
| **Vitamin A** | Retinoids / Stores | 13.5 hours | 1 (White) | 3 days | [159, 160, 161] |
| **Vitamin B-comp.** | Coenzymes | 1h – 25 days | 1 (White) | 3d / 28d | [162, 163, 164, 165] |
| **Vitamin D3 ***** | Hormonal / Stores | 15–25 days | 1 (White) | 3 days | [166, 167, 168] |
| **Vitamin E** | Antioxidant / Liver | 20 hours | 1 (White) | 4 days | [169, 170, 171, 172] |
| **Vitamin K2** | Coagulation | 1 – 72 hours | 1 (White) | 1d / 14d | [173, 174, 175] |
| **Zinc** | Enzymatic cofactor | 5 hours | 1 (White) | 3 days | [176, 177, 178] |

**Note: Specific washout protocols for TUDCA, Vitamin D, and Zinc are based on acute plasma levels to avoid treatment interference, despite longer systemic retention.*

*** Apigenin: Due to enterohepatic recirculation and a terminal half-life of 91.8h, a 19-day washout is required for chronic use, while 3 days suffices for short-term use to ensure full clearance.*

**** Vitamin D3: The 3-day washout targets the elimination of acute supplemental plasma surges. While the systemic half-life extends to weeks, sequestered adipose stores are considered metabolically stable and unlikely to participate in acute treatment interactions.*

# 12. Appendix B- Detailed evidence and pharmacokinetic documentation

**AHCC (Active hexose correlated compound)**

AHCC is a standardized extract of cultured *Lentinula edodes* mycelia, rich in alpha-glucans, utilized in integrative oncology for its immunomodulatory effects, specifically the enhancement of Natural Killer (NK) cell activity and cytokine modulation. In a definitive human Phase I safety trial, Spierings, E. L., Piraino, J. S., Esdaile, S. W., et al. [30] demonstrated that AHCC is well-tolerated at high doses (up to 9g/day) in healthy volunteers, with peak plasma concentrations occurring within a few hours of ingestion. Further research by Mathew, L., Gaikwad, A., Gonzalez, A., et al. [31] utilized orthotopic breast cancer models to evaluate the metabolic turnover of AHCC when combined with anticancer hormones like letrozole, finding no detrimental impact on treatment efficacy while emphasizing the necessity of metabolic clearance. Crucial pharmacokinetic insights provided by Coffer, L. W., Gaikwad, A., Fugit, R. V., et al. [32] examined AHCC’s interaction with Phase II hepatic pathways. Their findings indicate that while AHCC is a safe biosupport, its potential to induce enzymatic conjugation requires a 5-day washout to ensure that metabolic baselines are restored before the next oncology cycle.

**Akkermansia muciniphila**

*Akkermansia muciniphila* is a specialized gram-negative anaerobe that modulates the colonic mucus layer and enhances gut barrier integrity through the production of short-chain fatty acids. Unlike systemic compounds, its pharmacokinetics are defined by fecal persistence rather than plasma half-life. A landmark human proof-of-concept exploratory study by Depommier, C., Everard, A., Druart, C., et al. [33] demonstrated that daily supplementation is safe and significantly improves metabolic markers and insulin sensitivity. However, longitudinal microbial tracking shows that once supplementation ceases, the increased abundance of *Akkermansia* typically returns to baseline within 7 to 14 days. As noted in the editorial by Pircalabioru, G. and Margalef, N. [10], the interplay between gut microbiota and the immune-oncology axis is significant. Consequently, a 2-week washout is established to ensure the stabilization of the gut-immune signaling and the normalization of the intestinal environment prior to commencing systemic treatment.

**Activated charcoal**

Activated charcoal is a non-absorbable, highly porous carbon medium used for the emergency adsorption of toxins within the gastrointestinal lumen. Its clinical utility is governed strictly by gastrointestinal transit time, as it does not enter systemic circulation. The clinical analysis by Silberman, M., Galuska, M. A., and Taylor, A. [34] specifies that charcoal is most effective when administered within one hour of substance ingestion, with its elimination path determined by the natural bowel passage (typically 12–24 hours). Because of its broad adsorptive capacity, it poses a high risk of sequestering orally administered oncological drugs, such as tyrosine kinase inhibitors or pro-drugs. A 1-day washout is established as a physical safety margin, ensuring that the charcoal has been entirely excreted from the gastrointestinal tract, thereby leaving no residual material to interfere with the absorption of essential medications.

**ALA (Alpha-lipoic acid)**

Alpha-lipoic acid (ALA) is a unique organosulfur compound that serves as a vital mitochondrial cofactor and a potent antioxidant capable of regenerating glutathione and vitamins C and E. Human Phase I pharmacokinetic evaluations by Zárate, E., Bravo-Lamicq, C., Ocampo-Gutiérrez de Velasco, D. A., et al. [35] and comparative exposure studies by Yoon, J., Moon, S. J., Kim, J., et al. [36] have documented that ALA undergoes rapid absorption (t{max} < 1 hour) followed by prompt systemic elimination. The terminal half-life (*t½*) for the biologically active R-isomer is measured at approximately 15–20 minutes. While it plays a significant role in DNA repair and redox signaling, as discussed by Novotny, P., Laknerová, I., Jakubek, M., et al. [11] and Superti, F. and Russo, R. [37], it does not exhibit progressive accumulation. The 2-day washout is established to normalize the cellular antioxidant environment, specifically to prevent the unintended neutralization of the oxidative stress mechanisms required by certain chemotherapeutic agents or ionizing radiation.

**Amygdalin (B17)**

Amygdalin is a cyanogenic glycoside derived primarily from apricot kernels, historically marketed as "Laetrile." A rigorous clinical trial by Moertel, C. G., Fleming, T. R., Rubin, J., et al. [38], involving 178 cancer patients, conclusively proved that the compound lacks therapeutic efficacy and poses a severe risk of chronic cyanide poisoning. Upon ingestion, amygdalin is hydrolyzed by gut enzymes to release hydrocyanic acid, which inhibits mitochondrial cytochrome c oxidase, potentially leading to cellular hypoxia. Moertel’s study found blood cyanide levels in several patients approaching the lethal range. While the parent glycoside has a terminal half-life of 45–120 minutes, the metabolic clearance of its toxic cyanide residues is slower and more unpredictable. A mandatory 2-day washout is required to ensure that mitochondrial respiration has fully recovered and that all toxic metabolites have been renally excreted before oncology treatment begins.

**Andrographis paniculata**

*Andrographis paniculata*, or "King of Bitters," is standardized to its primary diterpene lactone, andrographolide, which possesses potent anti-inflammatory and NF-κB inhibitory properties. The systematic overview of nanoparticulate delivery by Raman, S., Murugaiyah, V., Parumasivam, T., et al. [39] highlights that the compound suffers from low oral bioavailability due to poor solubility and rapid first-pass metabolism. Pharmacokinetic profiles indicate a terminal half-life of approximately 6.67 hours. Because andrographolide can modulate hepatic Phase I and Phase II enzymes and significantly impact the cellular redox state, a 2-day washout is necessary. This ensures that any transient induction or inhibition of liver enzymes has resolved and that the systemic signaling has returned to a baseline state, minimizing the risk of pharmacokinetic interference with conventional chemotherapy.

**Apigenin**

Apigenin is a bioactive dietary flavonoid investigated for its ability to induce apoptosis and inhibit angiogenesis in various cancer models. Its pharmacokinetics are characterized by high lipophilicity and significant enterohepatic recirculation, which drastically slows its total clearance from the body. Wang, M., Firrman, J., Liu, L., et al. [40] and DeRango-Adem, E. F. and Blay, J. [42] have detailed the challenges of its low clearance and extensive metabolic conjugation. The definitive pharmacokinetic study by Gradolatto, A., Basly, J. P., Berges, R., et al. [43] measured a terminal half-life of 91.8 hours. Modern self-nanoemulsifying systems, as evaluated by Sato, V. H., Sato, H., Sangfuang, M., et al. [41], further enhance its bioavailability and tissue exposure. Given this long terminal phase, a 19-day washout is required for chronic users to ensure a clearance of five half-lives. Narimatsu, H., Yaguchi, Y., et al. [2] provide the broader context of its role as a potent polyphenol in oncology that requires careful timing. Apigenin exhibits complex pharmacokinetics. While acute plasma clearance is rapid (2.5–12h), chronic administration triggers significant enterohepatic recirculation with a terminal half-life of 91.8h. To ensure total systemic clearance, a 19-day washout is required for chronic users, while 3 days suffices for short-term use. Modern high-bioavailability formulations further increase tissue accumulation risks, justifying these conservative safety margins.

**Artemisinin**

Artemisinin is a sesquiterpene lactone from *Artemisia annua* that exerts Integrative support through the generation of iron-dependent reactive oxygen species (ROS). Pharmacokinetic studies in both healthy volunteers and malaria patients by Gordi, T., Huong, D. X., Hai, T. N., et al. [44] and Benakis, A., Paris, M., Loutan, L., et al. [45] indicate that artemisinin is rapidly eliminated, with a terminal half-life ranging from 1 to 5 hours. Uniquely, artemisinin induces its own metabolic enzymes (CYP2B6 and CYP3A4) over time, which may lead to even faster clearance during prolonged intake. Because of its extremely short presence in the blood and lack of tissue accumulation, a 1-day washout is sufficient to ensure that no residual free-radical generating molecules are present in the system before the initiation of chemotherapy or radiotherapy.

**Ashwagandha**

*Withania somnifera*, or Ashwagandha, is an adaptogen used to mitigate stress-related fatigue and modulate the cortisol response. Its primary markers, withanolides, exhibit significant biological activity. A pharmacokinetic study using advanced UHPLC-MS/MS by Modi, S. J., Tiwari, A., Ghule, C., et al. [46] showed that withanolides are absorbed rapidly but maintain a short systemic presence, with terminal half-lives of 1 to 5 hours. Despite this rapid clearance from the plasma, withanolides can cross the blood-brain barrier and exert lasting effects on the HPA axis and steroid receptor signaling. Due to documented interactions with hepatic enzymes and the potential for hormonal modulation, a 2-day washout is established to ensure that both the metabolic induction and the acute neuroendocrine effects have subsided before starting oncology protocols.

**Astragalus**

*Astragalus membranaceus* is a cornerstone of integrative oncology, used to stimulate hematopoietic recovery and enhance T-cell function. Its primary active marker is Astragaloside IV (AGS-IV). Human Phase I pharmacokinetic data by Xu, M., Yin, J., Xie, L., et al. [47] documented a linear elimination profile with a terminal half-life of 2.1 to 2.7 hours in healthy volunteers. While preclinical models by Tan, Y. Q., Chen, H. W., Li, J., et al. [49] and Qing, L. S., Li, J., Li, X. D., et al. [50] show slightly longer half-lives in dogs and rats, human data consistently confirm rapid turnover. Stępnik, K., Jarząb, A., Niedźwiadek, R., et al. [48] emphasize its immunomodulatory role in comprehensive reviews. Given its exceptionally low oral bioavailability (~2.2%) and quick renal clearance, a 1-day washout is sufficient to ensure complete elimination of circulating AGS-IV and its metabolites.

**Baicalin**

Baicalin is a flavonoid with potent anti-inflammatory and neuroprotective properties. A clinical study by Liu, X., Wang, L., Zhang, Y., et al. [51] examined the impact of a single dose of baicalin on the pharmacokinetics of cyclosporine A in healthy Chinese volunteers, finding no clinically significant interaction, which suggests a safe metabolic profile. However, baicalin is hydrolyzed by gut microflora to baicalein before absorption and then extensively re-conjugated in the liver. Because baicalin can act as a modulator of transport proteins and has a direct influence on inflammatory cytokine signaling, a 2-day washout is implemented. This period ensures that the complex metabolite cycle has been completed and that any transient influence on hepatic or intestinal transporters has resolved before oncological medication is introduced.

**Berberine**

Berberine is a plant alkaloid used to manage metabolic dysfunction by activating the AMPK pathway and inhibiting NF-κB signaling. It exhibits very low oral bioavailability (<1%) but has significant tissue distribution, particularly in the liver. Clinical reviews by Ai, F., Shen, J., Dong, W., et al. [52] indicate a terminal half-life of 12 to 15 hours. Modern self-emulsifying formulations, such as those evaluated by Solnier, J., Zhang, Y., Kuo, Y. C., et al. [53], can increase plasma exposure sixfold. Because berberine is a known inhibitor of P-glycoprotein and certain CYP450 enzymes, it has the potential to alter the concentration of many chemotherapeutic agents. A 3-day washout is required to ensure that tissue reservoirs are cleared and that the liver's metabolic pumps and enzymes have returned to their baseline activity.

**Boron**

Boron is a trace element involved in bone density and the modulation of steroid hormones. According to the Natural Health Canada [54] review, orally ingested boron (as boric acid or sodium borate) is rapidly and nearly completely absorbed. It is not metabolized in the body and is excreted unchanged primarily via the kidneys. Bartusik-Aebisher, D., Rudy, I., Rogóż, K., et al. [55] have explored its clinical mechanisms, noting a terminal half-life of approximately 21 hours in humans. While boron does not accumulate in soft tissues, it can temporarily influence the levels of free estrogen and testosterone by altering sex hormone-binding globulin (SHBG). A 5-day washout is established to ensure full renal clearance and to allow the hormonal environment to stabilize before commencing hormone-sensitive oncology treatments.

**Boswellia**

*Boswellia serrata* contains boswellic acids, such as AKBA, which act as specific inhibitors of 5-lipoxygenase (5-LOX). An open-label, single-dose pharmacokinetic trial by Kulkarni, P. D., Damle, N. D., Singh, S., et al. [56] measured an initial half-life of 6.8 hours for AKBA in healthy subjects. However, more recent randomized, single-dose comparative studies by Schmiech, M., Abdel-Kahaar, E., Ulrich, J., et al. [57] utilizing micellar formulations show that boswellic acids are highly lipophilic and sequester in adipose tissue, remaining detectable in plasma for up to 48 hours as they are slowly released. Roy, N. K., Parama, D., Banik, K., et al. [58] provide an update on their potential against chronic diseases, confirming their sustained biological impact. A 4-day washout is necessary to ensure that both the circulating levels and the lipophilic tissue stores are fully depleted.

**Butyrate**

Butyrate is a short-chain fatty acid that serves as the primary fuel for colonocytes and acts as a histone deacetylase (HDAC) inhibitor. Clinical pharmacokinetic data by Daniel, P., Brazier, M., Cerutti, I., et al. [59] show that butyrate is cleared with extreme speed from the blood, with an initial half-life of only 0.5 minutes and a terminal phase of 14 minutes. Even when utilizing novel production systems in the gut, as described by Jung, D. H., Yong, J. H., Hwang, W., et al. [60], systemic concentrations remain transient. Because butyrate is a natural metabolite that is rapidly oxidized by the liver and peripheral tissues, its systemic persistence is negligible. A 1-day washout is sufficient to ensure zero interference with the epigenetic or metabolic environment before the start of oncology treatments.

**Cannabis (THC/CBD)**

The pharmacokinetics of cannabinoids are dominated by their extreme lipophilicity, leading to extensive storage in body fat. Lucas, C. J., Galettis, P., Schneider, J. J., et al. [61] and Huestis, M. A. [62] have documented that THC has a terminal half-life of 20–30 hours. More significantly, recent modeling by Kolli, A. R., Hoeng, J., et al. [63] confirms that CBD exhibits a non-monotonic clearance with a terminal half-life exceeding 134 hours (>5.5 days). Both compounds are potent inhibitors of various CYP450 enzymes (particularly CYP3A4 and CYP2C9). Due to the potential for cannabinoids to slowly "leach" back into the blood from fat stores for weeks, a 28-day washout is established. This ensures complete adipose clearance and allows the liver’s enzymatic capacity to return to a baseline state, preventing dangerous drug-drug interactions.

**Coenzyme Q10 (CoQ10)**

CoQ10 is an essential mitochondrial cofactor and fat-soluble antioxidant. Due to its high molecular weight and lipophilic nature, its absorption is slow and incomplete. Systematic reviews by Bhagavan, H. N. and Chopra, R. K. [64] and Raizner, A. E. [65] have established that CoQ10 has a terminal plasma half-life of 33 to 57 hours. It is transported via lipoproteins and accumulates significantly in tissue depots, especially in the liver and heart. Bolt Pharmacy [66] notes that supplemental levels can take over a week to decline. To ensure that the artificially elevated antioxidant levels in the blood and cell membranes have normalized—avoiding the potential neutralization of oxidative oncology therapies—a 12-day washout is mandatory.

**DCA (Dichloroacetate)**

DCA is a metabolic modifier that shifts cancer cell metabolism away from glycolysis toward mitochondrial oxidation. It exhibits a unique "suicide" pharmacokinetic profile: as documented by Curry, S. H., Lorenz, A., Chu, P. I., et al. [67] and James, M. O. and Stacpoole, P. W. [68], DCA irreversibly inactivates the enzyme GSTZ1-1, which is responsible for its own metabolism. Consequently, repeated dosing leads to a dramatic increase in its half-life, often exceeding 10 hours as the body’s clearance capacity is depleted. Koltai, T. and Fliegel, L. [69] have highlighted the doubts and risks associated with this accumulation. Because it takes the body considerable time to synthesize new GSTZ1-1 enzymes, a 14-day washout is required to ensure complete metabolic recovery and clearance.

**DIM (Diindolylmethane)**

DIM is the primary bioactive metabolite of Indole-3-carbinol (I3C), specifically investigated in oncology for its ability to shift estrogen metabolism toward the protective 2-hydroxylation pathway, thereby reducing the levels of potentially proliferative 16-alpha-hydroxy metabolites. In a rigorous clinical Phase I dose-escalation study, Reed, G. A., Arneson, D. W., Putnam, W. C., et al. [71] established that DIM reaches peak plasma concentrations within 2 hours and possesses a terminal half-life of 4 to 8 hours. While the parent compound is cleared relatively quickly, Srikanth, Y., Reddy, D. H., Anusha, V. L., et al. [70] and Castañon, A., Tristram, A., Mesher, D., et al. [72] have elucidated its broader pharmacological reach, including the modulation of xenobiotic-sensing receptors and NF-κB signaling. Because DIM can influence hepatic Phase I enzymatic activity and exhibits significant inter-individual variability in clearance, a 3-day washout is established to ensure the complete elimination of all active metabolites and the stabilization of endocrine and metabolic signaling before oncology cycles begin.

**EGCG (Green tea extract)**

(-)-Epigallocatechin-3-gallate (EGCG) is the most abundant and potent catechin in *Camellia sinensis*, recognized for its extensive antioxidant capacity and inhibition of several oncogenic signaling cascades. Randomized, double-blind human pharmacokinetic trials by Ullmann, U., Haller, J., Decourt, J. P., et al. [73], utilizing repeated daily dosing, determined a terminal half-life of 3.4 to 5 hours. However, research by Lee, M. J., Maliakal, P., Chen, L., et al. [74] emphasizes that EGCG is subject to high individual variability in methylation and glucuronidation. Crucially, EGCG is a documented inhibitor of Organic Anion Transporting Polypeptides (OATP), which are cellular transporters responsible for the uptake of many chemotherapeutic drugs. To prevent pharmacokinetic interference with drug uptake and to allow these transport proteins to return to baseline activity, a 2-day washout is mandatory before initiating chemotherapy or targeted therapy.

**Genistein**

Genistein is a prominent soy isoflavone that functions as a phytoestrogen and a natural inhibitor of protein tyrosine kinases involved in cell proliferation. Detailed pharmacokinetic evaluations by Bloedon, L. T., Jeffcoat, A. R., Lopaczynski, W., et al. [75] and Ullmann, U., Metzner, J., Frank, T., et al. [76] found that while free genistein is cleared rapidly, its total conjugated form exhibits a terminal half-life of 7.7 to 10.2 hours. Yang, Z., Kulkarni, K., Zhu, W., et al. [77] have thoroughly investigated its ADME (Absorption, Distribution, Metabolism, and Excretion) profile, noting significant enterohepatic recirculation. Due to its potential to act as a weak estrogen and its interference with growth factor signaling, a 4-day washout is established to ensure the complete clearance of both the parent compound and its predominant glucuronidated conjugates.

**Shark liver oil (Alkylglycerols)**

Shark liver oil is primarily valued for its high concentration of alkylglycerols, which are natural lipids involved in the stimulation of the hematopoietic system and the enhancement of macrophage activity. Pugliese, P. T., Jordan, K., Cederberg, H., et al. [78] and Iannitti, T. and Palmieri, B. [79] have summarized their biological actions, highlighting their role in mitigating chemotherapy-induced leukopenia. Recent evidence from Paul, S., Smith, A. A. T., Culham, K., et al. [80] demonstrates that supplementation enriches endogenous plasmalogen level-specialized fats essential for cell membrane protection. While these lipids are progressively incorporated into cellular membranes, the supplemental circulating fraction in the plasma clears predictably. A 2-day washout is established as a safety margin to ensure that the acute supplemental levels have normalized before the introduction of conventional oncology agents.

**Honokiol**

Honokiol is a bioactive polyphenol from *Magnolia officinalis* with potent anti-angiogenic and pro-apoptotic effects across multiple cancer cell lines. Extensive reviews by Arora, S., Singh, S., Piazza, G. A., et al. [81] and Sarrica, A., Kirika, N., Romeilah, M., et al. [82] have validated its safety and therapeutic potential. Pharmacokinetically, honokiol exhibits a biphasic elimination profile with a terminal half-life of 2.3 to 5 hours. The most significant concern for integrative oncology, identified by Kim, S., Lee, Y., Shin, S., et al. [83], is honokiol’s potent inhibition of hepatic CYP1A and CYP2C enzymatic activity. Because these enzymes are critical for the metabolism of numerous clinical drugs, a 3-day washout is required to allow for the full recovery of liver enzyme capacity and to prevent dangerous increases in the concentration of chemotherapeutic agents.

**I3c (Indole-3-carbinol)**

I3C is a cruciferous-derived phytochemical that acts as an unstable precursor. In the acidic environment of the stomach, I3C undergoes rapid condensation to form various bioactive oligomers, primarily DIM. Definitive human trials by Reed, G. A., Arneson, D. W., Putnam, W. C., et al. [85] and Reed, G. A., Sunega, J. M., Sullivan, D. K., et al. [86] have demonstrated that I3C is essentially a pro-drug, with the parent molecule being virtually undetectable in plasma following ingestion. Its clinical effects are mediated entirely through its metabolites, as documented by Srikanth, Y., Reddy, D. H., Anusha, V. L., et al. [84]. Because the elimination of I3C is governed by the kinetics of its condensation products, the washout protocol mirrors that of DIM, necessitating a 3-day period to ensure the clearance of all persistent active residues.

**Ginger (Gingerols)**

Ginger contains several bioactive phenols, most notably 6-, 8-, and 10-gingerol and 6-shogaol, which are widely utilized for their anti-emetic and anti-inflammatory properties. A randomized Phase I clinical pharmacokinetic study by Zick, S. M., Djuric, Z., Ruffin, M. T., et al. [87] and Zhang, M., Thakur, K., Hu, F., et al. [88] have shown that while these compounds are absorbed rapidly, they are found in plasma primarily as glucuronide and sulfate conjugates with a short terminal half-life of 0.6 to 2.4 hours. Preciado-Ortiz, M. E., Martinez-Lopez, E., Rodriguez-Echevarría, R., et al. [89] have further highlighted the biological utility of 10-gingerol. Given that gingerols are cleared efficiently by hepatic and renal pathways and do not exhibit significant accumulation, a 2-day washout is sufficient to ensure complete systemic clearance before oncology treatment begins.

**L-Carnitine / Alc**

L-Carnitine and its acetylated derivative, Acetyl-L-Carnitine (ALC), are essential for mitochondrial fatty acid transport. Rebouche, C. J. [91] and Cao, Y., Wang, Y. X., Liu, C. J., et al. [90] have shown that carnitine is subject to tight renal regulation, with reabsorption rates exceeding 90%. While ALC is hydrolyzed quickly by plasma esterases [92], the total systemic carnitine pool possesses an exceptionally long terminal half-life of 38 to 119 hours due to its extensive storage and slow turnover in skeletal and cardiac muscle. Because supplemental carnitine significantly alters mitochondrial metabolic flux, a 13-day washout is required to allow the body's internal homeostasis and renal reabsorption thresholds to return to their baseline levels.

**Ldn (Low-dose naltrexone)**

LDN is an off-label application of naltrexone that utilizes transient opioid receptor blockade to trigger a rebound increase in endogenous endorphin and enkephalin production. Toljan, K. and Vrooman, B. [93] have reviewed its therapeutic utilization in chronic inflammatory and oncological conditions. Clinical records from DrugBank [94] specify that naltrexone has a half-life of 4 hours, but its primary metabolite, 6-beta-naltrexol, persists for approximately 13 hours. Renew Health [95] notes that the biological "rebound" effects on immune signaling last for roughly 24 hours after the drug has cleared the blood. To ensure that the opioid receptors are completely unoccupied—critical if the patient requires opioid-based pain management—and to stabilize the neuroendocrine signaling, a 3-day washout is necessary.

**L-Glutamine**

L-Glutamine is the most abundant free amino acid in human plasma and a primary energy source for intestinal enterocytes and immune cells. A population pharmacokinetic analysis by Sadaf, S., Dong, M., Pfeiffer, A., et al. [96] demonstrated that supplemental glutamine is absorbed and cleared rapidly, with a terminal half-life of 1 to 2 hours. Official pharmaceutical records from DrugBank [97] and technical naturokinetics from Protocol for Life Balance [98] confirm that glutamine does not accumulate in the system even with repetitive high-dose intake. Since it is an endogenous amino acid processed through primary metabolic pathways, a 2-day washout is established to ensure that supplemental levels have normalized and do not interfere with the metabolic baseline during oncology treatment.

**Liposomal curcumin**

Curcumin is a highly bioactive polyphenol with naturally poor solubility and rapid metabolism. Liposomal delivery systems significantly increase its systemic bioavailability. Bolger, G. T., Licollari, A., Tan, A., et al. [99] and Prasad, S., Tyagi, A. K., Aggarwal, B. B. [101] have documented this enhanced uptake in several models. However, even when bioavailability is improved, curcumin is cleared rapidly. Zhao, J., Li, X., Wang, J., et al. [100] found that curcumin is quickly converted into its tetrahydrocurcumin and glucuronide conjugates, with a plasma half-life of 24 to 42 minutes. Because curcumin and its conjugates are cleared so efficiently from the circulation, a 2-day washout is adequate for full systemic clearance before oncological intervention.

**Luteolin**

Luteolin is a dietary flavonoid known for its potent antioxidant and anti-tumor properties. Wang, R., Li, X., Xu, Y., et al. [102] and Lv, J., Song, X., Luo, Z., et al. [103] have examined its potential to disrupt multiple cancer signaling pathways. Pharmacokinetic studies in animal models by Sarawek, S., Feistel, B., Pischel, I., et al. [104] measured a terminal half-life of 5 to 9 hours for the free aglycone. In humans, luteolin undergoes extensive first-pass metabolism in the gut and liver to form various conjugates. Due to its potential impact on inflammatory signaling and hepatic enzyme pathways, a 2-day washout is implemented to ensure that all circulating conjugates have been eliminated and systemic signaling has returned to baseline.

**Lysine**

L-lysine is an essential amino acid critical for protein synthesis and collagen formation. Holeček, M. [105] provided an in-depth review of its physiological importance and metabolic pathways. Clinical pharmacokinetic data by Capparelli, E. V. [106] measured a terminal half-life of 15.7 hours in human subjects. Because lysine is actively transported into intracellular compartments via specialized transporters, tissue concentrations can remain elevated longer than plasma levels. Bier, D. M. [107] has addressed the safety assessment of such supplementation. To ensure the normalization of the systemic amino acid balance—specifically the lysine-arginine ratio which can affect cell growth—a 4-day washout is required before the start of treatment.

**Magnesium**

Magnesium is a vital mineral cofactor involved in over 300 enzymatic reactions. Gröber, U., Schmidt, J., and Kisters, K. [108] have detailed its complex interactions with various oncology-related drugs. Pharmacokinetic assessments by Okusanya, B. O., Oladapo, O. T., Long, Q., et al. [109] documented that magnesium is primarily excreted by the kidneys. Under normal physiological conditions, any supplemental magnesium above the renal threshold is cleared rapidly. DrugBank [110] provides a summary of its rapid systemic kinetics. A 2-day washout is established to ensure that supplemental plasma concentrations have returned to their baseline state, preventing any potential interference with the electrolyte balance required during intensive oncology protocols.

**Milk thistle (Silymarin/Silybin)**

Milk thistle contains a complex of flavonolignans known as silymarin. Wen, Z., Dumond, J., Schrieber, S. J., et al. [111] found that silymarin components are absorbed quickly but also undergo extensive Phase II metabolism. While the half-life of free silybin is only 1–3 hours, the total conjugated form can persist for up to 8 hours. Research by Xie, Y., Dumond, J. B., Wen, Z., et al. [112] highlighted that silybin undergoes significant enterohepatic recirculation, which maintains its presence in the system. Because silymarin can modulate metabolic enzymes and drug transporters (such as MRP2), a 2-day washout is necessary to ensure that the liver’s metabolic capacity has been fully restored.

**Melatonin**

Melatonin (N-acetyl-5-methoxytryptamine) is a pleiotropic pineal hormone that functions as a master regulator of the circadian rhythm while exhibiting significant oncostatic, pro-apoptotic, and antioxidant properties. A randomized, open-label crossover pharmacokinetic study by Andersen, L. P., Werner, M. U., Rosenkilde, M. M., et al. [113] indicates that oral melatonin suffers from a high first-pass effect, resulting in a low absolute bioavailability (~3%) and a rapid initial plasma half-life of 40 to 60 minutes. However, its pharmacokinetic profile is complicated by its metabolism via the CYP1A2 enzyme, which is a shared pathway for several chemotherapeutic agents. Furthermore, clinical reviews by Savage, R. A., Zafar, N., Yohannan, S., et al. [114] and specialized summaries [115] clarify that sustained-release formulations significantly alter the elimination curve, extending the presence of active melatonin for several hours. Because melatonin acts as a powerful chronobiotic and can modulate the sensitivity of tumor cells to oxidative stress (as contextualized by Cao, Y., et al. [23]), a 1-day washout is established to ensure that supplemental levels have normalized and do not compete with oncological drug metabolism.

**Metformin**

Metformin is a biguanide that, beyond its role in glycaemic control, is utilized off-label in oncology to activate the AMPK pathway and inhibit mTOR signaling. A critical review of its pathways by Gong, L., Goswami, S., Giacomini, K. M., et al. [116] demonstrates that metformin is not metabolically transformed; it is excreted 100% unchanged by the kidneys. However, its whole-body elimination is exceptionally complex due to its partitioning into red blood cells. Research by Xie, W., Chang, S., West-Thielke, S., et al. [117] revealed that while the plasma half-life is approximately 6.2 hours, metformin enters erythrocytes and is released back into the plasma at a much slower rate, leading to a terminal full-blood half-life of 23.4 hours. This erythrocyte "reservoir" effect, combined with its profound influence on cellular bioenergetics (as discussed by Khan, S. S., et al. [19] and Maurya, S. K., et al. [13]), necessitates a 5-day washout to ensure complete systemic clearance and metabolic stabilization.

**Probiotics (Lactic acid bacteria)**

Probiotics are exogenous microbial cultures utilized to modulate the gut-immune axis and mitigate the side effects of pelvic radiation or chemotherapy. Clinical evidence by Tremblay, A., et al. [118] and Bezkorovainy, A. [119] confirms that these bacteria do not permanently colonize the human gut; they are typically "washed out" within 3 to 6 days after the termination of intake. While the bacteria themselves remain within the gastrointestinal lumen, they produce biologically active postbiotics that influence systemic inflammatory markers and the tumor microenvironment (see Pircalabioru, G., et al. [10]). For general safety, a 2-day washout is sufficient. However, for patients entering a phase of expected myelosuppression (neutropenia), the washout is extended to 6 days. This conservative margin, supported by the clinical interplay between the microbiome and immunity [10], ensures that any risk of bacterial translocation or unintended immune overstimulation is eliminated during the most vulnerable treatment windows.

**Nac (N-acetylcysteine)**

NAC is a robust thiol-containing antioxidant and the rate-limiting precursor for the synthesis of intracellular glutathione (GSH). Human Phase I clinical trials by Papi, A., Luppi, F., Franco, F., et al. [120] and Olsson, B., Johansson, M., Gabrielsson, J., et al. [121] have elucidated its complex pharmacokinetics; while the half-life of free NAC is relatively short (2–6 hours), its "total NAC" profile reaches a terminal half-life of approximately 19 hours due to extensive covalent binding to plasma proteins and the formation of various disulfides. As detailed by dos Santos Tenório, A., et al. [122], NAC significantly shifts the cellular redox state and can inhibit pro-inflammatory transcription factors such as NF-κB. Because glutathione-mediated detoxification can potentially neutralize the pro-oxidant mechanisms of platinum-based chemotherapy or radiation, a 4-day washout is required to ensure that the intracellular antioxidant environment and the protein-bound NAC fraction have returned to baseline.

**Niacin (Vitamin B3)**

Niacin (nicotinic acid) is a precursor to the essential cofactors NAD+ and NADP+, which are critical for DNA repair and cellular energy metabolism. Pharmacokinetic studies by Menon, S., et al. [123] and Reiche, I., et al. [124] on extended-release niacin indicate rapid absorption and extensive conversion into active metabolites, primarily nicotinamide. While the half-life of the parent compound is less than one hour, the metabolite nicotinamide exhibits a half-life of approximately 4.3 hours. Official FDA clinical pharmacology data [125] confirm that 60–70% of a dose is eliminated renally within 96 hours. Given its role in poly-ADP-ribose polymerase (PARP) activity and its predictable renal clearance, a 2-day washout is established to ensure that supplemental NAD+ precursors have cleared the circulation and do not interfere with the intended DNA-damaging effects of oncological therapies.

**Nigella sativa (Black seed oil)**

*Nigella sativa* contains thymoquinone (TQ), a bioactive compound with well-documented antioxidant, anti-inflammatory, and chemosensitizing properties. Tekbaş, A., et al. [127] and Gouda, Y. A., et al. [128] have shown that TQ exhibits exceptionally high protein binding (>99%) and a complex distribution phase, often rendering it undetectable in human serum shortly after administration. However, the most critical risk factor for oncology patients, identified in pharmacokinetic studies by Ahmad, A., et al. [126], is TQ’s ability to act as a potent inhibitor of the CYP3A4 enzyme system. This inhibition can lead to a 200% increase in the concentration of certain chemotherapy drugs (e.g., Dasatinib), significantly elevating the risk of toxicity. Supported by the mechanistic findings of Yang, J., et al. [17], a 4-day washout is mandatory to allow the liver’s metabolic capacity to fully recover and to ensure that enzymatic activity has returned to baseline levels.

**Omega-3 (Fish oil)**

Omega-3 polyunsaturated fatty acids (EPA and DHA) are essential membrane lipids that modulate inflammatory signaling via the eicosanoid pathway. Randomized, open-label multiple-dose Phase 1 pharmacokinetic studies by Braeckman, R. A., et al. [129] and Lapointe, A., et al. [130] have documented that EPA has a terminal half-life of 79 hours, while DrugBank [131] and the FDA [132] list the half-life of DHA at approximately 46 hours. Crucially, these fatty acids are not merely circulating; they are physically incorporated into the phospholipid bilayers of cell membranes and thrombocytes (platelets). Because Omega-3s competitively inhibit the production of pro-thrombotic thromboxane A_2 and alter membrane fluidity, a 21-day washout is established. This duration corresponds to the turnover of the platelet population and ensures that the membrane-bound lipid environment has normalized, minimizing risks of bleeding and ensuring stable cellular signaling during surgery or intensive therapy.

**Pao Pereira**

*Pao Pereira* (*Geissospermum vellosii*) contains beta-carboline alkaloids (e.g., flavopereirine) which have shown potential to suppress cancer cell growth and increase the sensitivity of ovarian and prostate cancer cells to conventional chemotherapy (chemosensitization). Research by Bemis, D. L., et al. [133] and Yu, J. and Chen, Q. [134] has validated these effects in preclinical models. However, because there are currently no published human Phase I pharmacokinetic trials for this extract, the terminal half-life is estimated at 12–24 hours based on the chemical properties of structurally similar alkaloids. Due to the lack of human-specific data and the compound’s potent biological influence on cell cycle arrest, a conservative 5-day washout is applied. This safety margin ensures that no unintended pharmacodynamic interactions occur and compensates for the inherent uncertainty in the current pharmacological literature.

**Papaya leaf extract**

*Carica papaya* leaf extract is utilized to support the recovery of blood platelet counts (thrombocytes) in patients facing chemotherapy-induced thrombocytopenia. Clinical trials by Sathyapalan, D. T., et al. [135] and Sharma, A., et al. [137] have established its efficacy and safety in human populations. However, a specialized pharmacokinetic assessment by Nugrahaningsih, W. H., et al. [136] revealed an exceptionally slow elimination rate, with only 4.7% of the active fraction excreted within 48 hours. This indicates that the bioactive components (alkaloids and glycosides) linger in the systemic circulation far longer than most botanical extracts. Given its direct influence on hematopoietic signaling and its prolonged presence in the body, a 10-day washout is established to ensure complete clearance and to allow the natural platelet signaling pathways to stabilize before commencing new treatment cycles.

**Pau d’Arco**

Pau D’Arco (*Tabebuia impetiginosa*) contains naphthoquinones, primarily lapachol and beta-lapachone. Early clinical evaluations by the National Cancer Institute (NCI), reviewed by de Almeida, E. R., et al. [138] and Almeida, E. R. [140], highlighted that while lapachol possesses anti-tumor activity, it can induce significant toxicity and interfere with the Vitamin K-dependent coagulation cycle. Castellanos, J. R., et al. [139] found that these compounds also interact with mitochondrial enzymes and DNA topoisomerase. Based on clinical toxicity and clearance data, the terminal half-life is estimated at 24–48 hours. Due to the risk of coagulopathy (bleeding disorders) and its interference with critical DNA enzymes, a 10-day washout is mandatory to ensure that both the coagulation balance and the cellular enzymatic machinery have fully normalized.

**Quercetin**

Quercetin is a prominent dietary flavonol known for its ability to induce apoptosis and synergize with chemotherapy. Randomized pharmacokinetic crossover studies by Graefe, E. U., Wittig, J., Mueller, S., et al. [141] and Frenț, O. D., Vicaș, L. G., Ganea, M., et al. [142] have shown that standard quercetin glycosides have a short half-life of 1 to 3 hours. However, modern self-emulsifying and hydrogel delivery systems (Joseph, A., et al. [143]) and polymeric micelles (Hao, T., Huo, X., Li, Z., et al. [22]) significantly enhance its bioavailability and tissue exposure. As highlighted by Deng, H., et al. [4], quercetin is a potent inhibitor of the CYP3A4 enzyme and P-glycoprotein. Because the liver requires time to recover from this enzymatic blockade—critical for the metabolism of over 50% of oncological drugs—a 3-day washout is required to prevent significant pharmacokinetic interference and ensure patient safety.

**Resveratrol**

Resveratrol is a polyphenolic stilbenoid found in grapes that activates SIRT1 and modulates various longevity and cancer pathways. Patel, K. R., Scott, E., Brown, V. A., et al. [144] and Muñoz, S., et al. [145] have documented that resveratrol is rapidly metabolized in the liver, leading to a low initial bioavailability. However, Muñoz’s research discovered that with sustained daily intake (over 21 days), the terminal half-life increases significantly to approximately 9.7 hours as the compound and its metabolites accumulate in tissue reservoirs. Advanced oral formulations further enhance this systemic exposure, as demonstrated in a randomized, open-label, crossover study by Wang, H., et al. [146]. Because resveratrol can affect growth factors like IGF-1 and its metabolites are cleared slower than the parent compound, a 3-day washout is established to ensure full clearance of both the stilbenoid and its predominant glucuronide conjugates.

**Rhodiola rosea**

*Rhodiola rosea* is a high-altitude adaptogen standardized to salidroside, used to manage stress-related fatigue and modulate the HPA axis. Olsson, E. M., von Schéele, B., and Panossian, A. G. [147] conducted a randomized, double-blind trial that confirmed its efficacy in reducing cortisol response. Pharmacokinetic evaluations by Fan, F., Yang, L., Li, R., et al. [148] measured a terminal half-life for salidroside of 4 to 6 hours in humans. Recent evidence by Bertollo, A. G., Digiampietri, L., et al. [149] underscores its role in modulating neurotransmitters and neuroinflammation. While the half-life is relatively short, its profound influence on the body's hormonal and stress-response systems necessitates a 3-day washout. This period ensures that both the cortisol levels and the neuroendocrine signals have stabilized, preventing any unintended interference with the body's response to oncological stress.

**Reishi - Medicinal mushrooms**

Medicinal mushrooms, such as *Ganoderma lucidum*, contain a diverse array of bioactive triterpenes and complex beta-glucans. Clinical evidence summarized by Lucius, K. [150] and the Cochrane review by Jin, X., Ruiz Beguerie, J., Sze, D. M., et al. [151] confirm their immunomodulatory potential. While triterpenes are cleared rapidly (*t½* \approx 0.66 hours), the high-molecular-weight beta-glucans exert a prolonged effect by interacting with gut-associated lymphoid tissue (GALT) and modulating NK cell activity, as explored by Kirdeeva, M., et al. [152]. Because these mushrooms can alter the immune status and influence hepatic Phase I enzymes, a 5-day washout is mandatory. This ensures that the immunological signaling and the enzymatic environment in the liver have returned to baseline before commencing conventional oncology treatments.

**Sulforaphane**

Sulforaphane is a potent isothiocyanate derived from cruciferous vegetables, primarily acting as a key inducer of Phase II detoxification enzymes via the activation of the Nrf2-Keap1 signaling pathway. In a controlled crossover clinical trial, Egner, P. A., Chen, J. G., Wang, J. B., et al. [153] documented that while free sulforaphane is absorbed rapidly, it exhibits a short plasma half-life of approximately 2 to 3 hours. However, high-resolution metabolic profiling by Bouranis, J. A., et al. [154] revealed that its active metabolite, sulforaphane-nitrile, possesses a significantly slower elimination profile, remaining detectable in human subjects for up to 72 hours post-ingestion. As analyzed by Yagishita, Y., Fahey, J. W., Dinkova-Kostova, A. T., et al. [155], these persistent metabolites are the primary drivers for the sustained induction of hepatic enzymes. Because this enzymatic shift can lead to the accelerated metabolism and subsequent reduced efficacy of various chemotherapeutic agents, a 3-day (72-hour) washout is mandatory to ensure that Phase II enzymatic activity has returned to baseline before the initiation of oncology treatment.

**TUDCA (Tauroursodeoxycholic acid)**

TUDCA is a highly hydrophilic bile acid utilized for its potent cytoprotective properties, specifically its ability to act as a chemical chaperone that reduces endoplasmic reticulum (ER) stress and prevents apoptosis. Pharmacokinetic evaluations by Invernizzi, P., et al. [156] and Pena, M., et al. [157] have established that TUDCA possesses an exceptionally long terminal half-life, ranging from 3.5 to 5.8 days. This extreme persistence is a direct consequence of the enterohepatic circulation—a physiological loop where bile acids are continuously excreted into the duodenum and subsequently reabsorbed in the terminal ileum. Further molecular insights from Kusaczuk, M. [158] detail TUDCA's role in stabilizing protein folding and cellular structures. Because the compound remains trapped within this closed metabolic cycle and could exert unintended cytoprotective effects during chemotherapy or radiation, a full 28-day (4-week) washout is required to ensure complete systemic elimination and the restoration of normal bile acid homeostasis.

**Vitamin A (Retinol/Retinyl Palmitate)**

Vitamin A is a fat-soluble retinoid essential for cellular differentiation, immune surveillance, and genomic stability. Kinetic assessments by Davis, T. M., et al. [159] and Reinersdorff, D. V., et al. [160] indicate that the plasma half-life of circulating retinyl palmitate is approximately 13.5 hours. However, the critical pharmacokinetic challenge lies in the fact that Vitamin A is sequestered within the liver's hepatic stellate cells, where it maintains an extraordinarily long biological half-life of 128 days (approximately 4 months), as documented by Furr, H. C., et al. [161]. While a 3-day washout successfully clears the acute, free-circulating plasma fraction—thereby minimizing the risk of immediate pharmacodynamic interactions with oncology drugs—clinicians must remain cognizant that hepatic depots remain saturated for an extended duration. This distinction is vital in patients with potential hepatotoxicity or those undergoing treatments sensitive to high systemic retinoid levels.

**Vitamin B-complex**

The Vitamin B-complex consists of eight water-soluble vitamins serving as indispensable enzymatic cofactors for cellular metabolism and DNA synthesis. While the majority of these vitamins, such as thiamin (B1) and riboflavin (B2), are cleared rapidly via renal filtration within 1 to 2 hours (Ali, A., et al. [164]; FAO [165]), Vitamin B6 (pyridoxine) exhibits a markedly different kinetic profile. Research by Schellack, N., et al. [163] and Lindschinger, M., et al. [162] identifies that Vitamin B6 is sequestered in muscle tissue and possesses a terminal elimination phase of up to 25 days. Given that excessive B6 concentrations are clinically associated with the risk of peripheral neuropathy—a common and debilitating side effect of many chemotherapeutic agents—the washout protocol is bifurcated. A 3-day washout is sufficient for the general B-complex; however, a dedicated 28-day period is required if the patient has been utilizing isolated high-dose B6 supplements, ensuring complete systemic clearance and preventing the exacerbation of treatment-induced neurotoxicity.

**Vitamin D3 (Cholecalciferol)**

Vitamin D3 is a fat-soluble pro-hormone that undergoes two hydroxylation steps to become the biologically active 1,25-dihydroxyvitamin D3. In a pilot-randomized crossover trial, Charoenngam, N., et al. [166] and Fassio, A., et al. [168] established that while the blood levels of the precursor appear stable, the terminal half-life of Vitamin D3 is 15 to 25 days. Molecular evidence from Uçar, A., et al. [167] demonstrates that mature human adipocytes (fat cells) actively uptake and sequester Vitamin D3 from the circulation, leading to significant adipose tissue deposition. While the total body stores remain elevated for months, the immediate objective of the washout is to clear the acute, free circulating fraction within the plasma that could potentially interfere with acute treatment signaling. A 3-day washout is utilized to eliminate this immediate plasma presence before treatment cycles, while the background sequestered stores are considered stable and less likely to participate in acute drug-drug interactions.

**Vitamin E (Alpha-tocopherol)**

Vitamin E is the body's primary lipid-soluble antioxidant, essential for protecting cell membranes from oxidative damage. Human pharmacokinetic studies using isotope-labeling by Violet, M., et al. [169] and Zaffarin, A. S., et al. [172] indicate a plasma half-life of approximately 20 hours. However, longitudinal tracking by Handelman, G. J., et al. [170] revealed that Vitamin E is sequestered within adipose tissue and can persist for over 2 years, with levels declining only incrementally after cessation of intake. As highlighted by Podszun, M. and Frank, J. [171], high-dose Vitamin E can antagonize the effectiveness of drugs like tamoxifen and increase the risk of hemorrhage. A 4-day (96-hour) washout is mandatory to clear the excess circulating tocopherol and to allow the hepatic output to return to baseline, ensuring that the supplemental antioxidant defense does not inadvertently protect tumor cells from the oxidative mechanisms of chemotherapy or radiotherapy.

**Vitamin K2 (Menaquinone)**

Vitamin K2 is primarily supplemented as MK-4 or MK-7, homologues with fundamentally different pharmacokinetic behaviors. Sato, T., Schurgers, L. J., and Uenishi, K. [173] and Du, X., et al. [174] found that MK-4 exhibits a very short half-life of approximately 1 hour, making it transient in the blood. In contrast, MK-7 possesses a long terminal half-life of 72 hours (3 days), leading to significant systemic accumulation with daily dosing. The Council for Responsible Nutrition [175] emphasizes that MK-7 reaches much higher and more sustained blood levels than other forms. Because Vitamin K2 directly influences the coagulation cascade and can modulate various cell signaling pathways, a 14-day washout is required for MK-7 to ensure complete systemic elimination (spanning approximately five half-lives). For patients specifically using MK-4, a 24-hour washout is sufficient to achieve clearance.

**Zinc**

Zinc is an essential trace mineral that exhibits a distinct and complex two-phase elimination profile. Pharmacokinetic assessments by Salhab, A. S., et al. [176] and Ranasinghe, P., et al. [178] show an initial plasma half-life of roughly 5 hours. However, research by Vale, F., Leite, S., et al. [177] identified that zinc is subject to extensive enterohepatic recirculation—excreted in the bile and subsequently reabsorbed in the small intestine. This recycling mechanism can cause secondary spikes in plasma zinc concentrations up to 24 hours after the last dose. Because free circulating zinc can act as a potent chelator (binding to other molecules) and potentially interfere with the efficacy of metallodrugs like cisplatin or carboplatin, a 3-day washout is mandatory. This protocol ensures that the enterohepatic recycling has fully ceased and that systemic zinc levels have stabilized at a physiological baseline before oncology treatment.
